# Supplementary material for: Glycyrrhizin Exerts Antioxidative Effects in H5N1 Influenza A Virus-Infected Cells and Inhibits Virus Replication and Pro-Inflammatory Gene Expression
Source: PLOS journal article supplement (doi:10.1371/journal.pone.0019705), 2011-05-17
Supplement: S1 (10.1371/journal.pone.0019705.s001) [file journal.pone.0019705.s001]

Figure S1

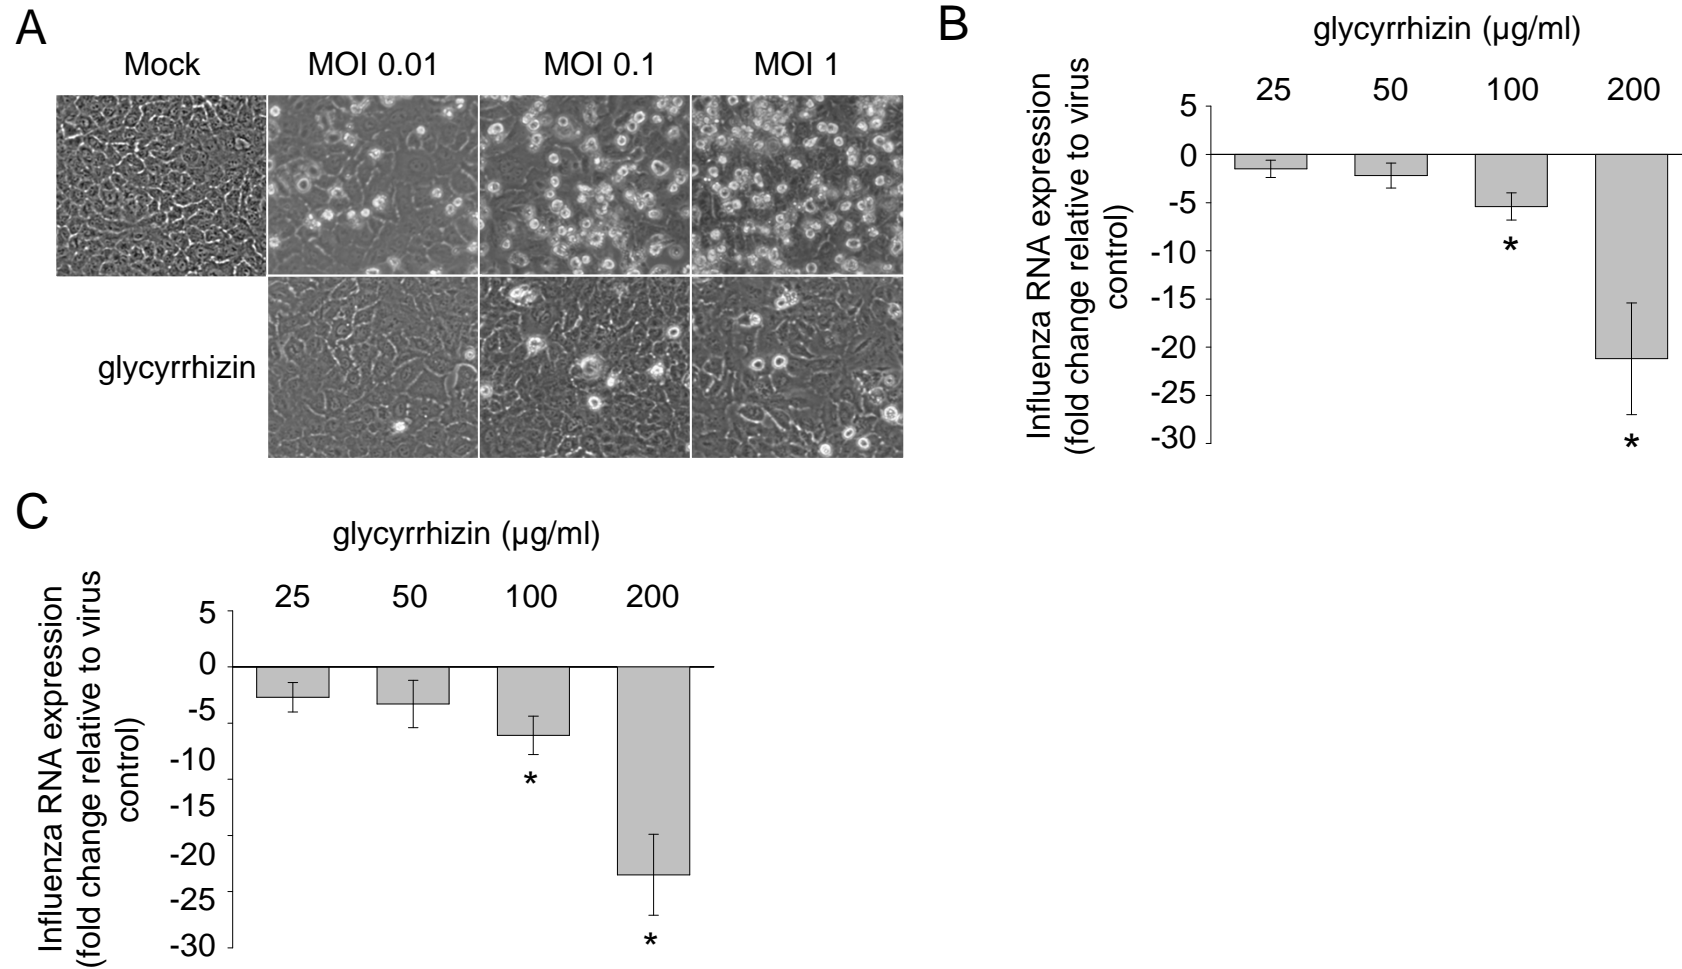

**Figure S1. Influence of glycyrrhizin on H5N1 replication in A549 cells.** A) Representative pictures of non-infected A549 cells (Mock) and cytopathogenic effect formation in A549 cells infected with H5N1 strain A/Vietnam/1203/04 at different multiplicities of infection (MOI) without or with glycyrrhizin (200  $\mu\text{g/ml}$ ) treatment for 24 h. B) and C) Effect of different glycyrrhizin concentrations on expression of influenza RNA detected by quantitative PCR in H5N1 A/Thailand/1(Kan-1)/04-infected (B) or A/Vietnam/1203/04-infected (C) A549 cells (MOI 0.01) 24 h post infection. \*  $P < 0.05$  relative to non-treated control
