# Supplementary material for: Glycyrrhizin Exerts Antioxidative Effects in H5N1 Influenza A Virus-Infected Cells and Inhibits Virus Replication and Pro-Inflammatory Gene Expression
Source: PLOS journal article supplement (doi:10.1371/journal.pone.0019705), 2011-05-17
Supplement: S2 (10.1371/journal.pone.0019705.s002) [file journal.pone.0019705.s002]

Figure S2

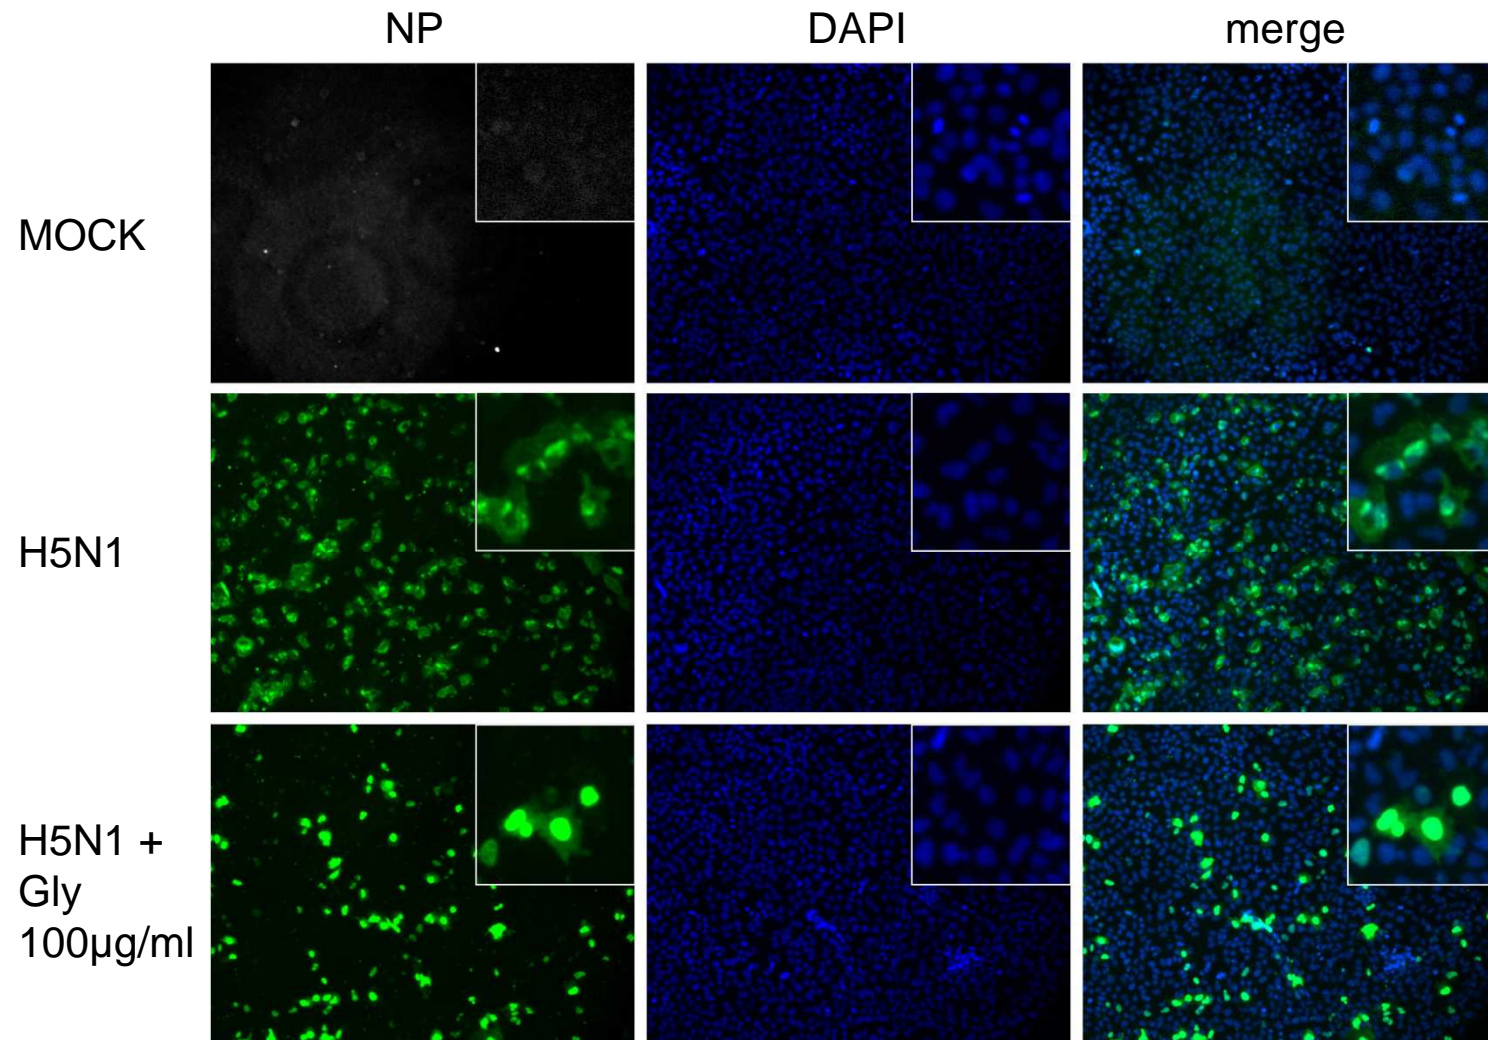

**Figure S2. Influence of glycyrrhizin on nuclear export of influenza A virus ribonucleoprotein (RNP) complexes.**

Influence of glycyrrhizine (Gly) on nuclear export of viral NP indicating RNP complexes in H5N1 A/Thailand/1(Kan-1)/04 (MOI 1)-infected A549 cells 8h p.i. RNP localisation (green) was visualised by fluorescence microscopy using an antibody directed against influenza A NP. Nuclei are stained by DAPI (shown in blue).
